# Supplementary material for: Perceptions of Factors Influencing Engagement With Health and Well-being Apps in the United Kingdom: Qualitative Interview Study
Source: PubMed Central journal article supplement (PMC8726027; doi:10.2196/29098), 2021-12-16
Supplement: mhealth_v9i12e29098_app2.pdf [file mhealth_v9i12e29098_app2.pdf]

## Multimedia Appendix 2.

### Screening questionnaire

| Question                                                                                                                                                                                                                                                                                                         | Response Options                                                                                                                                                                                                                                                                                                                                                                                                                              |
|------------------------------------------------------------------------------------------------------------------------------------------------------------------------------------------------------------------------------------------------------------------------------------------------------------------|-----------------------------------------------------------------------------------------------------------------------------------------------------------------------------------------------------------------------------------------------------------------------------------------------------------------------------------------------------------------------------------------------------------------------------------------------|
| How old are you?                                                                                                                                                                                                                                                                                                 | Enter free text                                                                                                                                                                                                                                                                                                                                                                                                                               |
| Are you able to travel to Norwich for the interview?                                                                                                                                                                                                                                                             | (1) Yes<br>(2) No                                                                                                                                                                                                                                                                                                                                                                                                                             |
| Do you own a smartphone with Internet access and capable of running apps?                                                                                                                                                                                                                                        | (1) Yes<br>(2) No                                                                                                                                                                                                                                                                                                                                                                                                                             |
| Which of the following best describes you?                                                                                                                                                                                                                                                                       | (1) I would like to stop smoking<br>(2) I would like to drink less or stop drinking<br>(3) I would like to lose weight to get healthier<br>(4) I would like to do more physical activity<br>(5) I sometimes feel down or depressed, and I would like to feel better<br>(6) I sometimes have anxiety, and I would like to feel better<br>(7) I would like to improve my mood<br>(8) Other: [Enter Free Text]<br>(7) None of these describes me |
| Have you used a health or wellbeing smartphone app to help you become healthier or to feel better?<br><i>(Examples of health or wellbeing smartphone apps: apps that can help you quit smoking, drink less, being more active, losing weight, become less depressed, become less anxious, improve your mood)</i> | (1) Yes<br>(2) No                                                                                                                                                                                                                                                                                                                                                                                                                             |
| If yes, what was the name of the health or wellbeing smartphone app(s) that you have used?                                                                                                                                                                                                                       | Enter free text                                                                                                                                                                                                                                                                                                                                                                                                                               |
| Are you currently using a smartphone app to help you become healthier or to feel better?                                                                                                                                                                                                                         | (1) Yes<br>(2) No                                                                                                                                                                                                                                                                                                                                                                                                                             |
| If yes, what was the name of the health or wellbeing smartphone app that you are currently using (if different from [earlier question])?                                                                                                                                                                         | Enter free text                                                                                                                                                                                                                                                                                                                                                                                                                               |
| Would you consider using a smartphone app in the future to help you become healthier or to feel better?                                                                                                                                                                                                          | (1) Yes<br>(2) No                                                                                                                                                                                                                                                                                                                                                                                                                             |

### Baseline questionnaire

| Question             | Response Options                                |
|----------------------|-------------------------------------------------|
| What is your gender? | (1) Female<br>(2) Male<br>(3) Other [free text] |

|                                                                                                |                                                                                                                                                                                                                                                                                                                                                                                                                                                                                                                                                                                                                                                                             |
|------------------------------------------------------------------------------------------------|-----------------------------------------------------------------------------------------------------------------------------------------------------------------------------------------------------------------------------------------------------------------------------------------------------------------------------------------------------------------------------------------------------------------------------------------------------------------------------------------------------------------------------------------------------------------------------------------------------------------------------------------------------------------------------|
| What is the highest level of education you have completed?                                     | <ul style="list-style-type: none"> <li>(1) Primary School</li> <li>(2) GCSEs or equivalent</li> <li>(3) A level or equivalent</li> <li>(4) University undergraduate programme</li> <li>(5) University post-graduate programme</li> <li>(6) Doctoral degree</li> </ul>                                                                                                                                                                                                                                                                                                                                                                                                       |
| What is your employment status?                                                                | <ul style="list-style-type: none"> <li>(1) Employed full-time</li> <li>(2) Employed part time</li> <li>(3) Self-employed full-time</li> <li>(4) Self-employed part-time</li> <li>(5) Unemployed</li> <li>(6) Unemployed and on state benefits</li> <li>(7) Unemployed - still in education</li> </ul>                                                                                                                                                                                                                                                                                                                                                                       |
| What is your ethnic group?                                                                     | <ul style="list-style-type: none"> <li>(1) English/Welsh/Scottish/Northern Irish/British</li> <li>(2) Irish</li> <li>(3) Gypsy or Irish Traveller</li> <li>(4) Any other White background</li> <li>(5) White and Black Caribbean</li> <li>(6) White and Black African</li> <li>(7) White and Asian</li> <li>(8) Any other Mixed/Multiple ethnic background</li> <li>(9) Indian</li> <li>(10) Pakistani</li> <li>(11) Bangladeshi</li> <li>(12) Chinese</li> <li>(13) Any other Asian background</li> <li>(14) African</li> <li>(15) Caribbean</li> <li>(16) Any other Black/African/Caribbean background</li> <li>(17) Arab</li> <li>(18) Any other ethnic group</li> </ul> |
| When was the last time you downloaded an app, if ever?                                         | <ul style="list-style-type: none"> <li>(1) Today or yesterday</li> <li>(2) In the last week</li> <li>(3) In the last month</li> <li>(4) In the last 3 months</li> <li>(5) In the last 6 months</li> <li>(6) More than 6 months ago</li> </ul>                                                                                                                                                                                                                                                                                                                                                                                                                               |
| How frequently do you use the apps on your smartphone, if at all?                              | <ul style="list-style-type: none"> <li>(1) Daily</li> <li>(2) Weekly</li> <li>(3) Monthly</li> <li>(4) Never</li> </ul>                                                                                                                                                                                                                                                                                                                                                                                                                                                                                                                                                     |
| Have your friends or family recommended any smartphone health or wellbeing app for you to use? | <ul style="list-style-type: none"> <li>(1) Yes</li> <li>(2) No</li> </ul>                                                                                                                                                                                                                                                                                                                                                                                                                                                                                                                                                                                                   |

|                                                                                        |                                                                                                                                                                                                                                                                                                          |
|----------------------------------------------------------------------------------------|----------------------------------------------------------------------------------------------------------------------------------------------------------------------------------------------------------------------------------------------------------------------------------------------------------|
| Have you recommended any smartphone health or wellbeing app to your friends or family? | (1) Yes<br>(2) No                                                                                                                                                                                                                                                                                        |
| How do you use your smartphone?                                                        | (1) Check your e-mail<br>(2) For social media (e.g. Facebook, Twitter, Instagram, etc.)<br>(4) Navigate using Google Maps or similar tools<br>(5) Read the news<br>(6) Research things to purchase<br>(7) Download and play games<br>(8) Download and use health/wellbeing apps<br>(9) Other [free text] |
