# Supplementary material for: Perceptions of Factors Influencing Engagement With Health and Well-being Apps in the United Kingdom: Qualitative Interview Study
Source: PubMed Central journal article supplement (PMC8726027; doi:10.2196/29098), 2021-12-16
Supplement: mhealth_v9i12e29098_app4.pdf [file mhealth_v9i12e29098_app4.pdf]

## Multimedia Appendix 4.

### Participants characteristics.

| ID  | Gender | Age | Ethnic group  | Highest education | Employment | Health or well-being topic of interest             | Ever used health apps | Current use of health app | Last time downloaded a health app | Frequency of health app use |
|-----|--------|-----|---------------|-------------------|------------|----------------------------------------------------|-----------------------|---------------------------|-----------------------------------|-----------------------------|
| P1  | Male   | 28  | Mixed         | UG                | part-time  | Physical Activity, Depression, Anxiety, Mood       | Yes                   | No                        | More than 6 months ago            | Infrequently                |
| P2  | Female | 44  | British       | Prof qual.        | full-time  | Diet, Physical Activity, Depression, Anxiety, Mood | Yes                   | Yes                       | In the last month                 | Daily                       |
| P3  | Female | 44  | Other African | UG                | full-time  | Diet, Physical Activity, Depression, Anxiety, Mood | Yes                   | No                        | More than 6 months ago            | None                        |
| P4  | Male   | 46  | British       | UG                | full-time  | Diet, Physical Activity, Depression, Anxiety, Mood | Yes                   | No                        | More than 6 months ago            | None                        |
| P5  | Male   | 37  | British       | A levels          | full-time  | Alcohol consumption, Diet, Physical Activity, Mood | Yes                   | No                        | More than 6 months ago            | None                        |
| P6  | Female | 53  | British       | PGT               | full-time  | Diet, Physical Activity, Depression, Mood          | Yes                   | Yes                       | In the last month                 | Daily                       |
| P7  | Male   | 22  | Mixed         | A levels          | student    | Physical Activity, Depression, Mood                | Yes                   | No                        | In the last 6 months              | Less often than monthly     |
| P8  | Male   | 52  | British       | UG                | full-time  | Diet, Physical Activity                            | Yes                   | Yes                       | In the last month                 | Daily                       |
| P9  | Male   | 38  | British       | PGT               | full-time  | Diet, Depression                                   | Yes                   | Yes                       | In the last month                 | Daily                       |
| P10 | Female | 48  | British       | GCSE              | part-time  | Diet, Physical Activity, Depression, Anxiety, Mood | Yes                   | No                        | In the last 6 months              | Weekly                      |

|     |        |    |             |          |           |                                                              |     |     |                        |                       |
|-----|--------|----|-------------|----------|-----------|--------------------------------------------------------------|-----|-----|------------------------|-----------------------|
| P11 | Female | 68 | British     | GCSE     | retired   | Depression, Anxiety, Mood                                    | Yes | Yes | In the last month      | Daily                 |
| P12 | Male   | 57 | British     | GCSE     | retired   | Alcohol consumption                                          | No  | No  | <i>Not applicable</i>  | <i>Not applicable</i> |
| P13 | Male   | 28 | British     | UG       | full-time | Smoking, Diet, Physical Activity, Mood                       | Yes | Yes | In the last month      | Weekly                |
| P14 | Female | 64 | British     | GCSE     | full-time | Diet                                                         | Yes | Yes | In the last 6 months   | Weekly                |
| P15 | Female | 56 | British     | GCSE     | full-time | Diet, Physical Activity                                      | Yes | Yes | More than 6 months ago | Daily                 |
| P16 | Female | 34 | Other white | A levels | full-time | Smoking, Diet, Physical Activity, Depression, Anxiety, Mood, | Yes | Yes | In the last 3 months   | Weekly                |
| P17 | Male   | 31 | British     | UG       | full-time | Diet, Physical Activity, Depression                          | Yes | Yes | More than 6 months ago | Daily                 |
| P18 | Female | 21 | British     | A levels | full-time | Diet                                                         | Yes | Yes | In the last 6 months   | Daily                 |

Note: GCSE – General Certificate of Secondary Education (in the UK), A levels – General Certificate of Education Advanced Level (in the UK); UG – Undergraduate Degree; PGT – Postgraduate Taught Degree
